# Supplementary material
Source: publisher figshare collection journal article supplement (https://tandf.figshare.com/ndownloader/files/17227577)
Supplement: Supplementary file 1 [file 17227577]

## APPENDIX A

Table A1  
Crash severity of fatal and injury crashes by inattention status

| Crash severity       | Not inattention |      | Inattention  |      | $\chi^2$ |
|----------------------|-----------------|------|--------------|------|----------|
|                      | <i>N</i> =110   | %    | <i>N</i> =50 | %    |          |
| Fatal                | 14              | 12.7 | 2            | 4.0  | 3.4 ns   |
| Admitted to hospital | 34              | 30.9 | 14           | 28.0 |          |
| Treated at hospital  | 61              | 55.5 | 33           | 66.0 |          |

Note: 2 cases unknown
